# Supplementary material for: Asynchronous mixing of kidney progenitor cells potentiates nephrogenesis in organoids
Source: PubMed Central journal article supplement (PMC7214420; doi:10.1038/s42003-020-0948-7), 2020-05-11
Supplement: 42003_2020_948_MOESM3_ESM.pdf [file 42003_2020_948_MOESM3_ESM.pdf]

## Description of Additional Supplementary Files

**File Name:** Supplementary Data 1

**Description:** Source data file
